# Supplementary material
Source: Springer Nature journal article supplement (https://www.springermedizin.de/resource/supplementary/12885_2012_3457_MOESM1_ESM.pdf/9463930)
Supplement: MOESM1 [file 9463930]

# Additional file 1

A

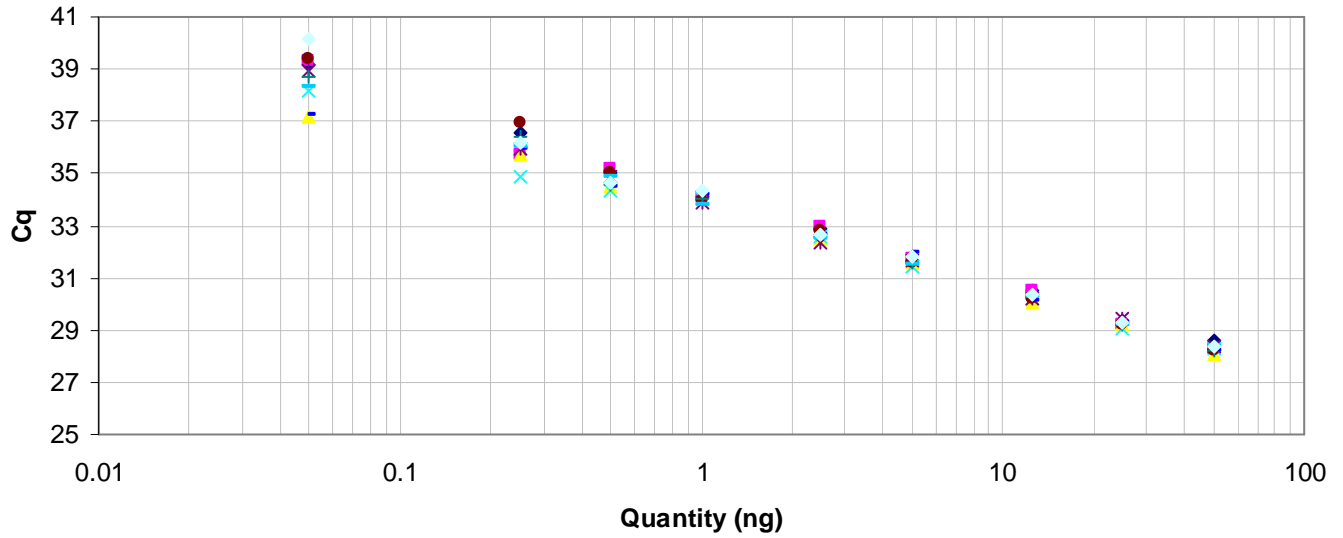

B

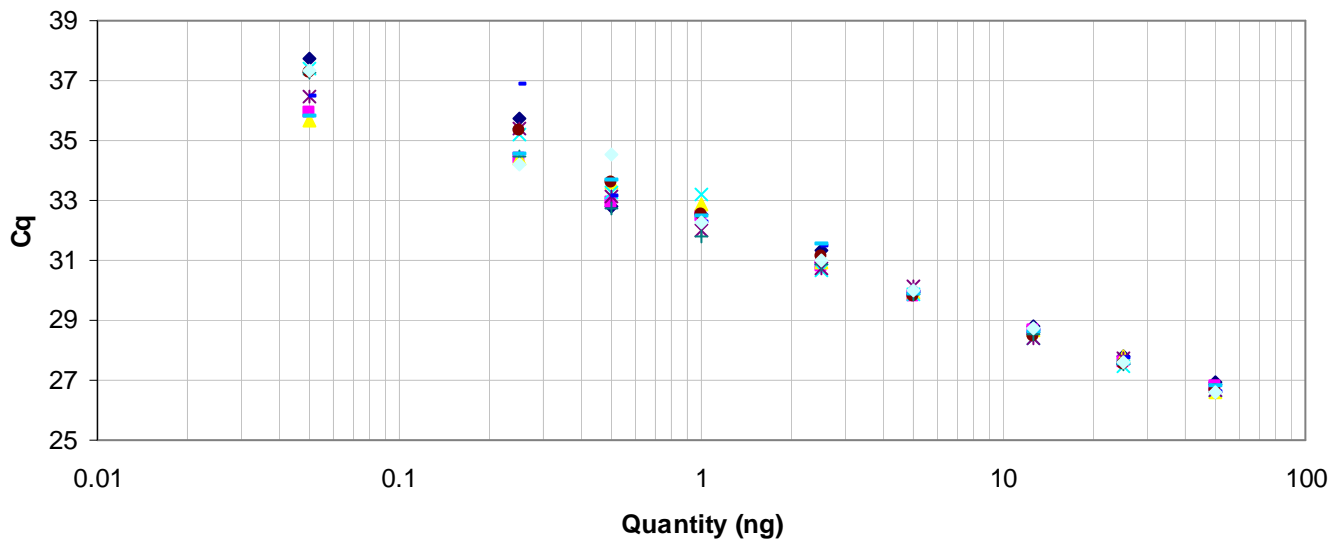

C

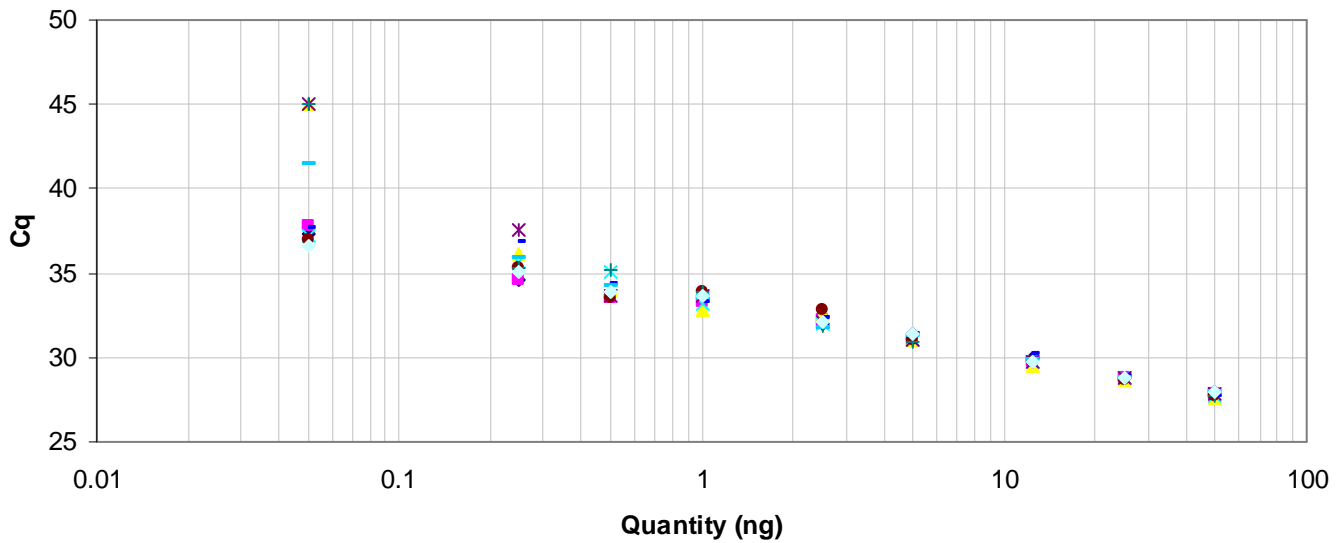

**Additional file 1. Reproducibility of multiplex qMSP.** Serial dilutions of methylated DNA (SiHa) spiked with unmethylated DNA (EK) in order to obtain a serial dilution of 50 ng to 0.25 ng methylated DNA in a total of 50 ng of DNA, showed high reproducibility when testing the multiplex qMSP in 10-fold.
